# Vimentin binds to G-quadruplex repeats found at telomeres and gene promoters

Silvia Ceschi<sup>1</sup>, Michele Berselli<sup>3</sup>, Mery Giantin<sup>4</sup>, Stefano Toppo<sup>2,3\*</sup>, Barbara Spolaore<sup>1,2</sup>, Claudia Sissi<sup>1,2\*</sup>

<sup>1</sup> Department of Pharmaceutical and Pharmacological Sciences, University of Padova, 35131, Padova, Italy

<sup>2</sup> CRIBI Biotechnology Center (Centro di Ricerca Interdipartimentale per le Biotecnologie Innovative), University of Padova, 35131, Padova, Italy

<sup>3</sup> Department of Molecular Medicine, University of Padova, 35131, Padova, Italy

<sup>4</sup> Department of Comparative Biomedicine and Food Science, University of Padova, 35020, Legnaro, Italy

\* [stefano.toppo@unipd.it](mailto:stefano.toppo@unipd.it); [claudia.sissi@unipd.it](mailto:claudia.sissi@unipd.it)

## Abstract

G-quadruplex (G4) structures that can form at guanine-rich genomic sites, including telomeres and gene promoters, are actively involved in genome maintenance, replication, and transcription, through finely tuned interactions with protein networks. In the present study, we identified the intermediate filament protein Vimentin as a binder with nanomolar affinity for those G-rich sequences that give rise to at least two adjacent G4 units, named G4 repeats. This interaction is supported by the N-terminal domains of soluble Vimentin tetramers. The selectivity of Vimentin for G4 repeats vs individual G4s provides an unprecedented result. Based on GO enrichment analysis performed on genes having putative G4 repeats within their core promoters, we suggest that Vimentin recruitment at these sites may contribute to the regulation of gene expression during cell development and migration, possibly by reshaping the local higher-order genome topology, as already reported for lamin B.

## Introduction

DNA is organized into hierarchical layers inside the nucleus. These are established through long-range chromatin interactions,<sup>1</sup> which allow the creation of loops, where sets of genes are brought together into topologically associating domains (TADs)<sup>2</sup> and enhancers-promoters communication is facilitated.<sup>3</sup> The spatial association of TADs with similar properties, leads to the creation of the transcriptionally active (euchromatic) and repressive (heterochromatic) compartments.<sup>4</sup> Heterochromatin is mainly found at the nuclear periphery, while euchromatin fills the nucleoplasm.<sup>5</sup> Still, regions of active chromatin are found near nuclear pore complexes.<sup>6</sup> This organization is constantly reshaped during early development and differentiation, reflecting the required gene expression program.<sup>7</sup>

While CCCTC binding factor (CTCF) and the cohesin complex have been identified as principally responsible for creating loops and TADs,<sup>8</sup> lamin B receptor seems to play a pivotal role in tethering heterochromatin to the nuclear periphery.<sup>9</sup> However, the molecular mechanisms underlying enhancers-promoters contacts and compartmentalization are still not fully elucidated. In this regard, accumulating evidence suggests that, at accessible chromatin regions,<sup>10</sup> DNA folding into non-canonical structures may drive the recruitment of architectural proteins to promote gene clustering.<sup>11,12</sup>

Among all DNA non-canonical secondary structures, G-quadruplexes (G4s) are tetra-helical arrangements that form within guanine-rich tracts. Here, four guanines interact through Hoogsteen hydrogen bonds to form planar arrays (G-tetrads) that stack one upon the other, building the core of the structure.<sup>13</sup> G-quadruplexes can adopt different topologies depending on the relative orientation of the DNA strands (parallel, antiparallel, hybrid) and the shape of the loops connecting the G-tetrads.<sup>14</sup> G-quadruplexes have been detected within the human genome.<sup>15</sup> They are found at telomeres, 5' UTR regions, introns, and gene promoters. Interestingly, G4 motifs are depleted within house-keeping genes, while they are enriched

47 within developmental and oncogenic ones, suggesting that they may play a specific role in the regulation of  
48 these gene clusters during cell development and cancer progression.<sup>15</sup> Ligands that selectively bind to G4s  
49 at promoters have been shown to influence the expression of the associated genes, thus supporting a  
50 functional role of these structures.<sup>16</sup>

51 Noteworthy, the enrichment in putative G4 forming sequences within enhancers and at TADs boundaries  
52 suggests that G-quadruplexes may regulate gene expression through their involvement in the  
53 tridimensional organization of the genome.<sup>17</sup> This picture is supported by the ability of G4s to recruit  
54 architectural and chromatin remodeling factors such as the (SWI/SNF)-like chromatin remodeler ATRX,<sup>18</sup>  
55 the architectural protein HMGB1,<sup>19,20</sup> and the heterochromatin associated protein HP1 $\alpha$ .<sup>21</sup> Recently, Li L.  
56 and collaborators showed that G4 structures participate to the YY1-mediated DNA looping, thus providing  
57 experimental evidence to this model.<sup>12</sup>

58 Still, a clear correlation between the complex G4 structural features and protein recruitment is lacking.

59 In the present study, we focused on peculiar G4 arrangements, to whom we will refer here as G4 repeats.  
60 G4 repeats comprise two or more adjacent G4 modules, which eventually give rise to end-to-end mutual  
61 interactions. They were first characterized for the human telomeric sequence, where multiple adjacent G4s  
62 interact through transient  $\pi$ - $\pi$  stacking of the external tetrads.<sup>22</sup> More recent studies highlighted the ability  
63 of gene promoter sequences to also give rise to G4 repeats.<sup>23,24,25</sup> Among them, the hTERT sequence,  
64 located within the core promoter of telomerase, folds into three interacting parallel three-quartet G4s,<sup>23</sup>  
65 the ILPR sequence, located within the promoter of insulin, folds into two cross-talking hybrid four-quartet  
66 G4s,<sup>24</sup> while KIT2KIT\*, which is found within the core promoter of *c-KIT*, folds into two interacting parallel  
67 three-quartet and antiparallel two-quartet G4s.<sup>25</sup>

68 With the aim to identify proteins able to interact with G4 repeats, we performed pull-down assays with  
69 KIT2KIT\* using nuclear extracts from the *KIT*-positive HGC-27 cell line. Noteworthy, we found the  
70 architectural protein Vimentin as the best interactor. By using a small panel of sequences, we showed that  
71 Vimentin binds to G4 repeats regardless of their sequence and topology and with high selectivity with  
72 respect to other DNA arrangements.

73 Vimentin is the first reported protein selective for G4 repeats vs individual G4s. This points to G4 repeats as  
74 unique structural elements involved in the higher-order genome architecture.

75

76

## 77 Results

78 **Identification of nuclear proteins that bind to the KIT2KIT\* G4 repeat.** To identify nuclear proteins that  
79 interact with KIT2KIT\* G4 repeat, pull-down assays were performed with nuclear extracts from the *KIT*-  
80 positive HGC-27 cell line. Streptavidin-coated paramagnetic beads were derivatized with the biotinylated  
81 oligonucleotide and subsequently incubated with nuclear extracts. Bound proteins were eluted with a KCl  
82 gradient (Supplementary Fig. S1A). A last fraction was obtained by boiling beads in denaturing Laemmli  
83 sample loading buffer.<sup>26</sup> When solved by SDS-PAGE (Figure 1A), this last fraction exhibited three main  
84 bands that were cut and subjected to in-gel trypsin digestion and LC-MS<sup>E</sup> analyses for protein identification.  
85 Two of them (bands S1 and S2 at ~15 kDa and ~28 kDa, respectively) corresponded to Streptavidin  
86 monomer and dimer that detached from the beads along boiling procedure (Table 1; detailed data are  
87 given as Supplementary Material-Excel file). That aside, the band at ~50 kDa (band V in Figure 1A) was  
88 associated to the intermediate filament protein Vimentin (Table 1; detailed data are given as  
89 Supplementary Material-Excel file). Experiments performed with KIT2KIT\* paired with its complementary  
90 strand revealed a different protein elution pattern (Supplementary Fig. S1B). Most importantly, no  
91 enrichment in Vimentin was observed within the last fraction (Figure 1B).

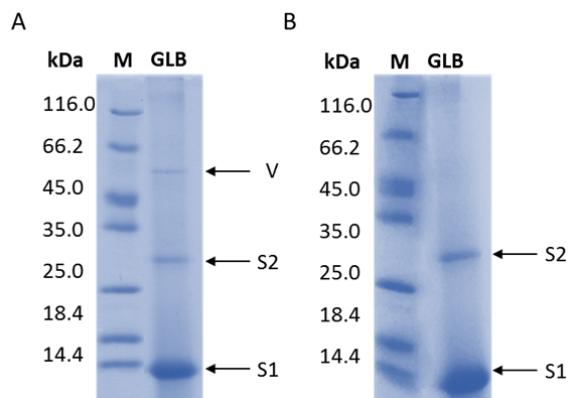

**Figure 1: Pull-down assays identified Vimentin as a binder for the KIT2KIT\* G4 repeat.** SDS-PAGE of the last eluted fraction obtained from pull-down assays performed with KIT2KIT\* **a** G-quadruplex and **b** duplex. Bands corresponding to Streptavidin monomer (S1) and dimer (S2) and Vimentin (V) are highlighted.

**Table 1.** Proteins identified by LC-MS<sup>E</sup>.

| Gel band | Protein (Organism)                   | Mass (Da) <sup>a</sup> | UniProtKB AC | Score | Coverage (%) | Significant Sequences <sup>b</sup> |
|----------|--------------------------------------|------------------------|--------------|-------|--------------|------------------------------------|
| V        | Vimentin (Homo sapiens)              | 53676                  | P08670       | 746   | 54           | 25                                 |
| S2       | Streptavidin (Streptomyces avidinii) | 18822                  | P22629       | 333   | 37           | 4                                  |
| S1       | Streptavidin (Streptomyces avidinii) | 18822                  | P22629       | 432   | 37           | 4                                  |

<sup>a</sup> Molecular monoisotopic mass of the UniProt sequence after cysteine carbamidomethylation.

<sup>b</sup> Number of significant peptides sequenced by LC-MS<sup>E</sup>. The significant peptides identified for each protein with their expectation values are listed in Supplementary Material-Excel file.

**Vimentin selectively binds to G4 repeats.** To validate the binding of Vimentin to the G4-folded KIT2KIT\*, we performed electrophoretic mobility shift assays (EMSA) with the purified recombinant protein. The oligonucleotide was equilibrated in 150 mM KCl to promote G-quadruplex formation before protein addition. To avoid Vimentin polymerization into filaments, binding reactions were carried out at pH 8.4. Indeed, under these experimental conditions, Vimentin is stably arranged into tetramers.<sup>27</sup> As shown in Figure 2A, at pH 8.4, free Vimentin tetramers migrate toward the anode as well as Vimentin-DNA complexes. Vimentin was proved able to bind to KIT2KIT\*, leading to a well-defined band belonging to the complex. A fraction of free DNA appeared as a retarded band as a result of partial dissociation of the complex during the run. Noteworthy, no complex was observed when Vimentin was incubated with the isolated KIT2 and KIT\* G-quadruplexes.

To determine whether KIT2KIT\* recognition was based on sequence composition or structural features, we tested other DNA sequences for which the folding into G4 repeats akin to KIT2KIT\* was already reported. Figure 2B shows EMSA performed with the insulin-linked polymorphic region (ILPR) and the human

118 telomerase promoter (hTERT). With both oligonucleotides Vimentin formed single well-defined complexes.  
119 The heterogeneity of the so far tested sequences suggests that Vimentin recruitment is driven by DNA  
120 folding into G4 repeats, irrespectively of G-quadruplex topology and number of G-tetrads. Therefore, to  
121 better characterize this interaction, we moved to the telomeric sequence, as it constitutes an easily tunable  
122 model for G4 repeats. Indeed, by increasing the number of TTAGGG repeats, the resulting oligonucleotide  
123 folds into one (TEL), two (2TEL), three (3TEL) or four (4TEL) adjacent G-quadruplexes.<sup>22</sup> Moreover, Vimentin  
124 association with telomeres has already been observed within living cells.<sup>28</sup> As expected, Vimentin did not  
125 bind to the single telomeric G4 (Figure 2C) while it interacted with the G4 repeats. With 2TEL and 4TEL it  
126 formed a single complex whereas in the presence of 3TEL, two different complexes were detected, possibly  
127 reflecting the reported conformational heterogeneity of this oligonucleotide in solution.<sup>29</sup>  
128

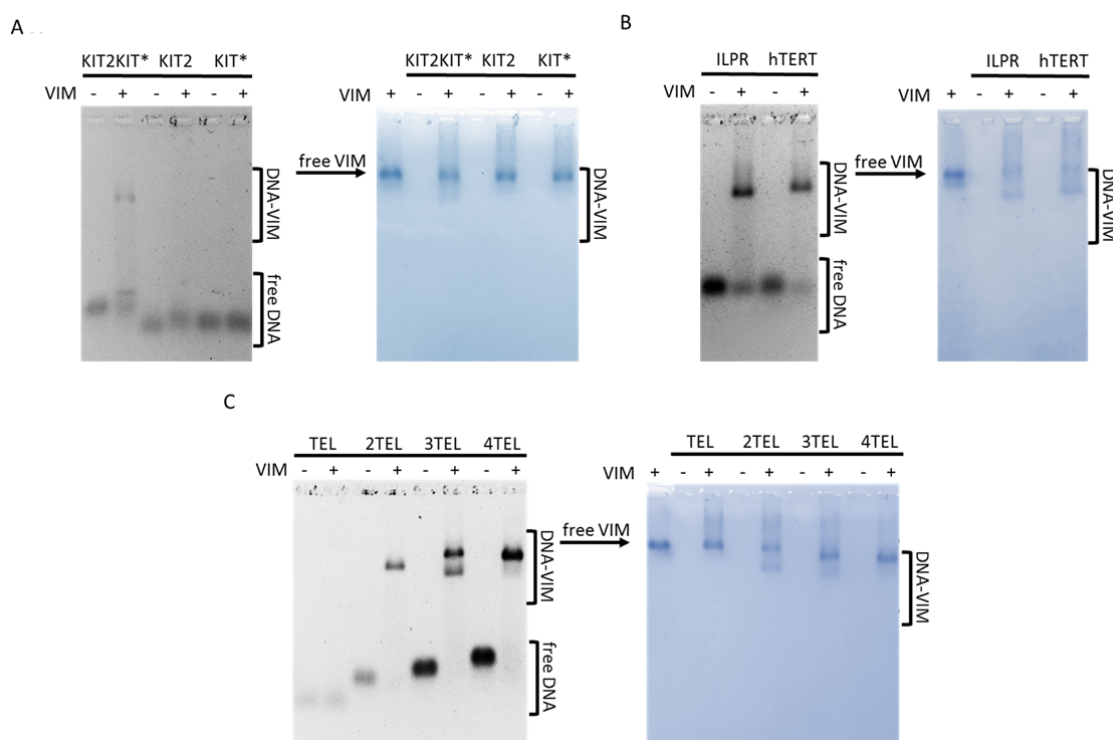

129  
130  
131  
132  
133  
134

**Figure 2: Vimentin selectively binds to G4 repeats.** EMSA of 500 nM **a** KIT2KIT\*, KIT2 and KIT\*, **b** ILPR and hTERT, **c** TEL, 2TEL, 3TEL and 4TEL G-quadruplexes with 8  $\mu$ M Vimentin in 5 mM Tris-HCl (pH 8.4), 150 mM KCl, stained with Sybr Green II (on the left) and with colloidal Coomassie Brilliant Blue G250 (on the right).

135 The selectivity of Vimentin for G-quadruplex vs duplex and single-stranded DNA was proved by performing  
136 EMSA with double-stranded KIT2KIT\* and 2TEL and with a 49-mers G-rich oligonucleotide (G-rich noG4)  
137 unable to fold into G4, as demonstrated by circular dichroism (Supplementary Fig. S2). Vimentin little  
138 interacted with double-stranded DNA, leading to poorly defined complexes (Supplementary Fig. S3). As  
139 regards the unfolded single-stranded oligonucleotide, no binding was detected. Interestingly enough, when  
140 the same experiments were performed under KCl-free conditions, Vimentin interacted with both single and  
141 double-stranded oligonucleotides (Supplementary Fig. S3), in line with the already reported association of  
142 Vimentin with G-rich DNA.<sup>30,31</sup> The fact that this interaction is completely abolished in the presence of 150  
143 mM KCl, while the binding to G4 repeats is maintained, suggests that the binding of Vimentin to duplex and  
144 unfolded oligonucleotides is based on aspecific electrostatic interactions, while its binding to G4s relays on  
145 a more specific binding pattern.

146

147 **One Vimentin tetramer binds to two adjacent G4s with nanomolar affinity.** The stoichiometry of Vimentin  
 148 binding to G4 repeats was investigated according to the method of continuous variations (or Job method),<sup>32</sup>  
 149 the complex formed at variable Vimentin and oligonucleotide molar fractions being solved by agarose gels  
 150 and quantified. The Job plot derived for the complex of Vimentin with the telomeric G4 repeat 2TEL (Figure  
 151 3A) showed maximal complex formation at 0.2 DNA molar fraction, corresponding to a 1:4 DNA:Vimentin  
 152 binding stoichiometry. Thus, interaction is likely to occur between a Vimentin tetramer and two adjacent  
 153 G4s. Consistently, in the presence of 4TEL, the Job plot showed a maximum at 0.1 DNA molar fraction,  
 154 confirming the recruitment of two Vimentin tetramers on a stretch of four contiguous G4s (Figure 3B).  
 155 To quantitatively determine the affinity of Vimentin for the telomeric G4 repeat, we followed the change in  
 156 fluorescence anisotropy of 5'-6-FAM labelled 2TEL, upon titration with the protein. Analyses were  
 157 performed considering the concentration of Vimentin tetramers and data were fitted according to a 1:1  
 158 binding model. Results showed that Vimentin binds strongly to 2TEL, with a  $K_D$  value of  $25.7 \pm 2.4$  nM  
 159 (Figure 3C).  
 160

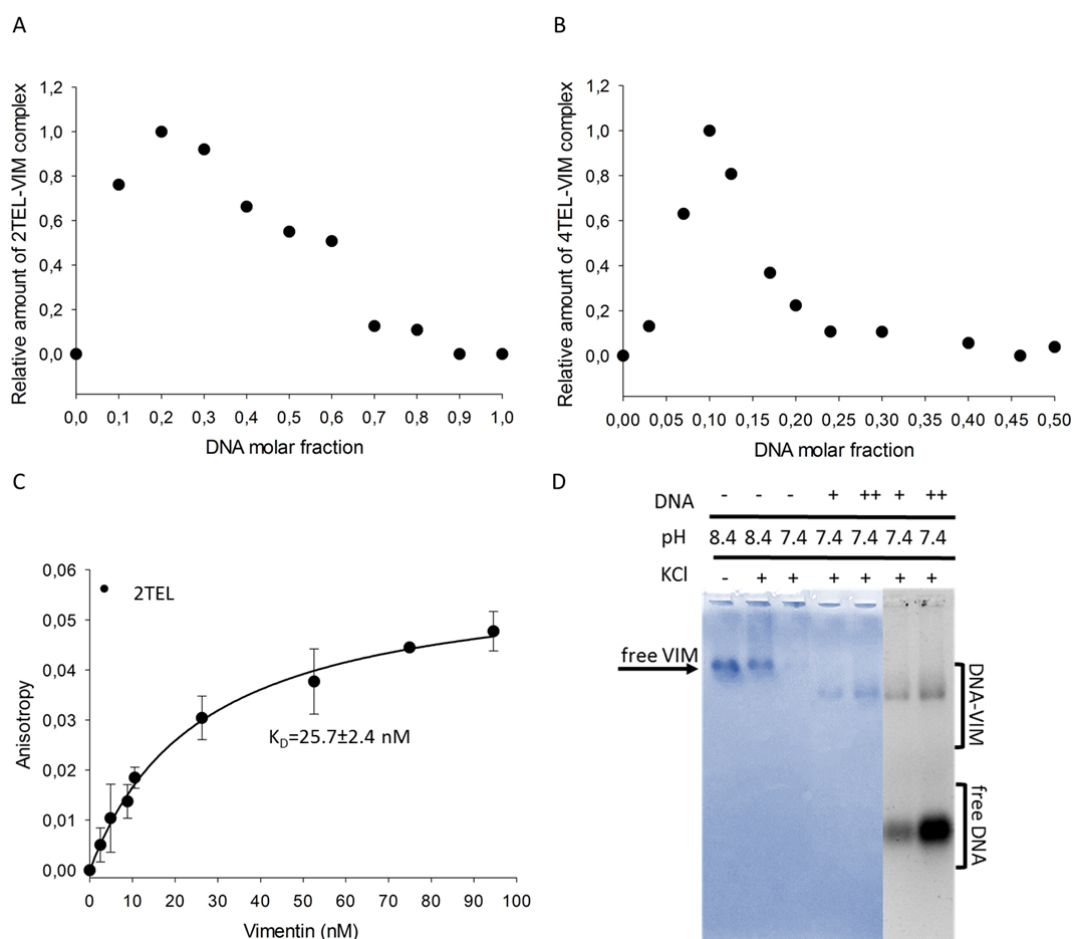

161

162

163 **Figure 3: Vimentin binds to the telomeric G4 repeat as a soluble tetramer with a 1:1 stoichiometry and nanomolar affinity.** Job  
 164 plot derived from EMSA performed with Vimentin and **a** 2TEL, **b** 4TEL, in 5 mM Tris-HCl (pH 8.4), 150 mM KCl, at constant sum of  
 165 oligonucleotide and protein concentrations (10  $\mu$ M), and by varying their molar fraction. **c** Fluorescence anisotropy for monitoring  
 166 the binding of Vimentin with the telomeric G4 repeat (5 nM 5'-6-FAM-2TEL) in 5 mM Tris-HCl (pH 8.4), 150 mM KCl at 25  $^{\circ}$ C. The  
 167 data represent mean  $\pm$  s.d. from three independent experiments. Vimentin concentration is calculated as tetramers concentration. **d**  
 168 EMSA of 8  $\mu$ M Vimentin with 2  $\mu$ M (+) and 8  $\mu$ M (++) 2TEL performed in 5 mM Tris-HCl (pH 7.4), 150 mM KCl, stained with  
 169 Coomassie Brilliant Blue G250 and Sybr Green II.

170 **Vimentin binding to G4 repeats competes with filament assembly.** To assess whether Vimentin assembly  
171 into filaments impacts on its G4 binding properties, we performed EMSA with 2TEL in 150 mM KCl, at pH  
172 7.4 (Figure 3D). Indeed, as previously reported by Herrmann and colleagues,<sup>27</sup> lowering the pH to 7.4 in the  
173 presence of high ionic strength, causes extensive polymerization of Vimentin. This clearly emerges from the  
174 almost complete disappearance of the band corresponding to Vimentin tetramers in agarose gels (third  
175 lane of Figure 3D). Interestingly, when 2TEL was added to polymerized Vimentin, the complex with the  
176 soluble tetrameric form of the protein formed, as evidenced by the appearance of its characteristic band. In  
177 line with the dynamic reversible assembly of Vimentin,<sup>33</sup> the protein polymerization into filaments does not  
178 prevent the binding to G4 repeats. Instead, this interaction competes with filament assembly.

179  
180 **Vimentin N-terminal domain is involved in the interaction with G4 repeats.** To identify the Vimentin  
181 domains that are involved in the interaction with G4 repeats, we performed limited proteolysis  
182 experiments on tetrameric Vimentin in the absence and in the presence of stoichiometric amounts of 2TEL.  
183 Proteolysis was performed with trypsin since Vimentin contains several lysine and arginine residues  
184 homogeneously distributed along the sequence (Supplementary Fig. S4). Proteolysis reaction mixtures  
185 obtained after different times of incubation were solved by SDS-PAGE (Figure 4) and the sequence of the  
186 fragments was determined by in-gel trypsin digestion followed by LC-MS<sup>E</sup> analyses. In Table 2 the  
187 aminoacidic sequence assigned to each band is reported.

188 Analysis of the Vimentin band at time = 0 min (band 0 in Figure 4) gave a sequence coverage of 91%  
189 (Supplementary Material-Excel file), with only some internal regions missing (amino acids 97–99, 235–269,  
190 292–293 and 310–312). In the absence of DNA, after 1 min from trypsin addition, full-length Vimentin was  
191 converted into two main species (bands 3 and 4 in Figure 4), corresponding to the protein lacking  
192 respectively the N-terminal domain (band 3), and both the C-terminal and N-terminal domains (band 4).  
193 This result fits with the intrinsically unfolded state of the N-terminal and C-terminal domains that makes  
194 them readily subjected to proteolysis. Addition of DNA promoted a delay in proteolysis. Worth of note,  
195 after 1 min from trypsin addition, two different species were generated from the full-length protein (bands  
196 1 and 2 in Figure 4). These correspond to Vimentin lacking the first three amino acids at the N-terminal  
197 domain (band 1) and to Vimentin lacking the same three amino acids at the N-terminal domain plus the C-  
198 terminal domain (band 2). These data confirm the involvement of the N-terminal domain in the binding to  
199 G4 repeats.

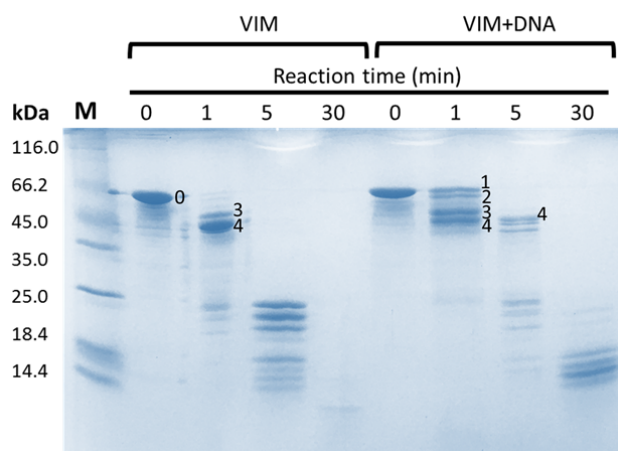

200  
201  
202  
203  
204  
205

**Figure 4: Vimentin N-terminal domain is involved in the interaction with G4 repeats.** SDS-PAGE of the mixtures obtained from limited proteolysis performed with trypsin on tetrameric Vimentin, in 5 mM Tris-HCl (pH 8.4), 150 mM KCl, in the absence or in the presence of stoichiometric amounts of 2TEL. The reaction was quenched after 0, 1, 5 and 30 minutes from trypsin addition. Labeled bands were cut and subjected to 'in-gel' trypsin digestion and LC-MS<sup>E</sup> analyses for peptide sequencing.



206  
207  
208  
209

**Table 2.** Vimentin fragments identified in the bands by in-gel trypsin digestion and LC- MS<sup>E</sup> analyses.

| Band | Fragment | Mass (kDa) |
|------|----------|------------|
| 0    | 1–465    | 53.6       |
| 1    | 4–465    | 53.2       |
| 2    | 4-438    | 50.1       |
| 3    | 69–465   | 46.5       |
| 4    | 69–438   | 43.3       |

210  
211

212 **Putative G4 repeats are found within the promoter of genes involved in the cellular response to external**  
213 **stimuli, cell-cell communication and locomotion.** So far, we showed that Vimentin selectively binds to G4  
214 repeats. To search for sequences putatively able to adopt such conformation, we previously developed  
215 QPARSE tool and highlighted their non-random distribution within human gene promoters.<sup>34</sup> Here, we  
216 refined our search focusing on the first 100bp upstream the Transcription Starting Site (TSS) of the genes,  
217 since this is the region where we previously found the highest frequency in putative G4 repeats.<sup>34</sup>  
218 Moreover, it comprises the already characterized G4 repeats KIT2KIT\* and hTERT, for which a role in  
219 controlling the expression of the downstream gene has been experimentally confirmed.<sup>35,36</sup>

220 All the promoter regions corresponding to genes annotated in GENCODE v34 (38404 sequences) were  
221 downloaded from ENSEMBL.<sup>37</sup> The software identified 1477 genes containing at least one putative double  
222 G4 repeat (two adjacent G4s) and 295 sequences containing a putative triple G4 repeat (three adjacent  
223 G4s). Sequences with a triple G4 repeat were a subset of those with a double G4 repeat, as expected, apart  
224 for only one gene due to the slightly different searching criteria. Overall, the retrieved sequences  
225 potentially able to fold into a double or triple G4 repeat are 1478. The median GC content of these  
226 sequences is 80% and 98% of this subset shares a GC content greater than 60%. We refer to this list as  
227 double\_triple\_G4\_PQS. We further selected a background population for comparison including 14053  
228 sequences that share the same high GC content with double\_triple\_G4\_PQS (greater than 60%) but do not  
229 contain any putative double or triple G4 repeat. We call this list GC\_rich\_BKG.

230 Using these two lists of genes, we performed a GO enrichment analysis using DAVID tool,<sup>38</sup> to look for a link  
231 between the reported physio-pathological roles of the G4 repeats containing genes, and those related to  
232 Vimentin.

233 The more interesting results are summarized in Figure 5 (Detailed results are found in Supplementary  
234 Material-Excel file).

235 Cellular component analysis revealed a significant enrichment in cell membrane components, particularly in  
236 those engaged in cell junctions. Both biological process and functional analyses highlighted an enrichment  
237 in proteins responsible for cell-cell communication, signal transduction and locomotion, together with an  
238 overrepresentation of genes involved in neurogenesis and nervous system development. We performed  
239 the same analyses with Panther tool<sup>39</sup> and again we found a significant enrichment in plasma membrane

240 components, particularly those participating to cell surface signaling, cellular response to external stimuli  
241 and cell-cell communication.

242

243

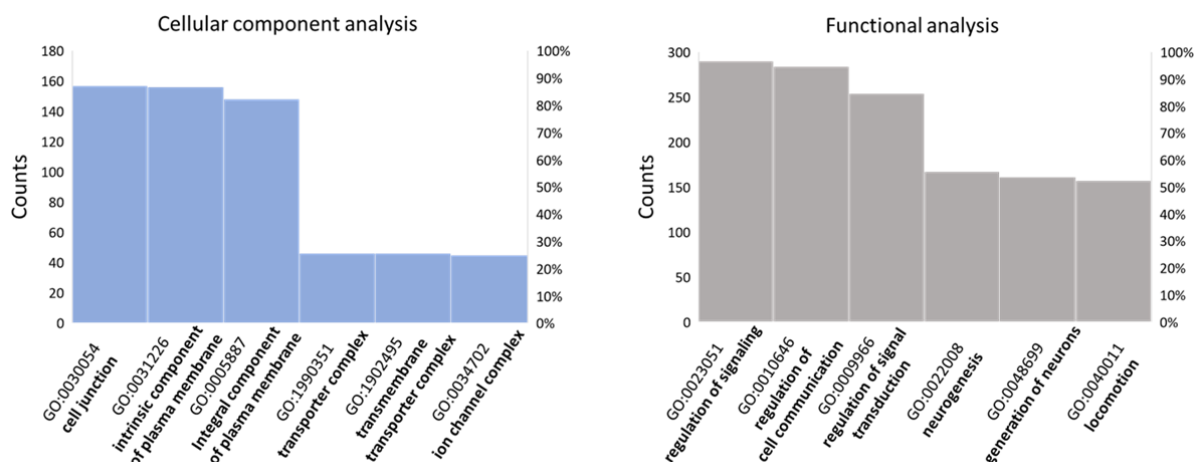

244

245

246

247

248

249

**Figure 5: Putative G4 repeats are enriched within the core promoters of genes involved in the cellular response to external stimuli, cell-cell communication, and locomotion.** Results of GO enrichment analysis performed with David tool on human genes presenting putative G4 repeats within their promoters.

250

## Discussion

251

252

253

254

255

256

257

258

259

260

261

262

263

264

265

266

267

268

269

270

271

272

Vimentin is an intermediate filament protein highly expressed within migratory cells that are present at the early stage of embryonic development.<sup>40</sup> Its postnatal expression is restricted to motile cells such as fibroblasts, endothelial cells, lymphocytes, and Swann cells.<sup>41</sup> Noteworthy, epithelial cells rely on Vimentin expression to acquire fibroblast-like morphology and increased migratory capacity during epithelial to mesenchymal transition (EMT), which occurs both during physiological tissue development/regeneration and pathological cancer progression toward metastasis.<sup>42</sup>

As a structural protein with main cytosolic localization, Vimentin function reported so far is to orchestrate cytoskeletal rearrangements and mechano-signaling in support to cell migration.<sup>41</sup> Interestingly, studies conducted on poorly differentiated metastatic cancer cells revealed the presence of Vimentin within their nuclear matrixes, while it was no longer detected upon induction of cell differentiation.<sup>43,44</sup> Moreover, in human embryo fibroblasts, Vimentin has been found in tight association with telomeres and centromeres.<sup>28</sup> These data point to specific functions of Vimentin at nuclear level.

In the present study, we found that the fraction of Vimentin that was present within nuclear extracts of undifferentiated HGC-27 cells, binds to DNA in a structure dependent/sequence independent manner. Indeed, it efficiently interacts with different G4-folded DNA sequences with almost no binding to the corresponding unfolded/duplex conformations. As a further level of specificity, the presence of at least two adjacent G4s is required for Vimentin recruitment, regardless of the topology of the participating G4s (parallel+antiparallel for KIT2KIT\*, hybrid for telomeric G4s and ILPR, parallel for hTERT) and the total number of G-tetrads (five for KIT2KIT\*, six for 2TEL, eight for ILPR, nine for hTERT). Indeed, Vimentin does not bind to individual G4s, regardless of their number of G-tetrads (two for KIT\*, three for KIT2 and TEL) and topology (antiparallel for KIT\*, parallel for KIT2 and hybrid for TEL). This is the first time to our knowledge that a G4-binding protein displays selectivity for G4 repeats.



273 Vimentin exists in a highly dynamic state within living cells, where post-translational modifications drive  
274 filament assembly/disassembly, in response to changes that occur in the extracellular environment.<sup>33,45</sup> In  
275 the present study, we showed that Vimentin binds to DNA G4 repeats in the tetrameric form, the  
276 stoichiometry of the complexes being one Vimentin tetramer every two adjacent G4s. Noteworthy, this  
277 interaction shifts the Vimentin assembly equilibrium toward the naturally present soluble fraction.<sup>46</sup>  
278 Vimentin assembly into filaments proceeds through the lateral association of Vimentin tetramers into unit  
279 length filaments (ULF) followed by the N-terminal to C-terminal longitudinal annealing of ULF to yield  
280 mature filaments.<sup>47</sup> Our limited proteolysis experiments showed that the interaction of Vimentin with G4s  
281 occurs at the N-terminal domains, and this can affect the longitudinal annealing of ULF into filaments.  
282 Noteworthy, Vimentin tetramers switch from A11-type (where the N-terminal domains are oriented toward  
283 the center of the tetramer) to A22-type (where the N-terminal domains are placed at the edge of the  
284 tetramer) during ULF formation.<sup>48</sup> Therefore, the binding of G4 repeats to the soluble A11-type tetramers  
285 may also prevent the type-switching and, consequently, ULF formation.

286 The high affinity of Vimentin for G4 repeats fits with its already reported association with telomeres and  
287 centromeres. The herein acquired *in vitro* evidence of Vimentin binding to G4 repeats at gene promoters  
288 suggests that the same interaction may occur within living cells as well. In this regard, GO enrichment  
289 analysis performed on genes having putative G4 repeats within their core promoters revealed an  
290 overrepresentation of cell membrane components, particularly those participating to cell-cell  
291 communication and cell surface signaling. Noteworthy, among them there is the zinc finger protein SNAI1,  
292 the expression of which was shown to be directly regulated by Vimentin during EMT.<sup>42</sup> It is thus tempting to  
293 suggest that the binding of Vimentin at G4 repeats may contribute to the regulation of the expression of  
294 the associated genes, possibly contributing to wider DNA topological changes. In this regard, Vimentin was  
295 shown to influence not only nuclear shape and mechanics, but also chromatin condensation within  
296 mesenchymal cells.<sup>49</sup> It has been reported that soluble pools of Vimentin-related lamin A/C and B can  
297 contact euchromatin within the nucleoplasm, promoting gene clustering within the so-called euchromatin  
298 lamin associated domains (eLADs), ultimately regulating their expression.<sup>50,51</sup> Of particular interest is the  
299 involvement of lamin B1-eLADs in chromatin reorganization that occurs during EMT. Indeed, lamin B1 was  
300 shown to bind to G-rich promoters of genes that belong to the EMT pathway, helping the establishment of  
301 the EMT transcriptional program.<sup>51</sup> Soluble pools of Vimentin may exert a similar function, or even provide  
302 lamin B a way to contact DNA at G-rich promoters. Indeed, the direct interaction of Vimentin C-terminal  
303 domain with lamin B has already been reported *in vitro*.<sup>52</sup>

304 GO enrichment analysis also highlighted the presence of putative G4 repeats within the promoters of genes  
305 involved in neurogenesis and nervous system development. In this regard, the relevance of Vimentin in  
306 neurological development is well established.<sup>53,54</sup> In a recent study, high levels of soluble Vimentin were  
307 detected in the axoplasm of neurons following neuronal injury. Vimentin was found able to translocate  
308 from the site of injury to the soma through direct interaction with  $\beta$ -importin and dynein-mediated  
309 retrograde transport. The authors point to a signaling role for soluble Vimentin during neural injury, in  
310 support to neurite regeneration.<sup>55</sup> Noteworthy, the direct interaction of Vimentin with  $\beta$ -importin, provides  
311 a mechanism for its entry into the nucleus in response to peripheral stimuli.

312 Overall, these evidences support a correlation between the functions of soluble Vimentin and those of the  
313 genes containing putative Vimentin binding sites at their promoters.

314 To conclude, in the present study, we identified the intermediate filament protein Vimentin as a selective  
315 binder for G4 repeats. The fact that Vimentin does not bind to individual isolated G4s could provide her a  
316 way to contact DNA at specific genomic loci, including telomeres, centromeres, and a distinct subset of  
317 gene promoters. Further studies are needed to unravel the biological significance of such interaction within  
318 human living cells. Our working hypothesis is that G4 repeats may exist as primary structural elements, able

319 to drive the recruitment of architectural proteins to ultimately reshape the higher-order genome folding  
320 during important physiological processes such as cell development, differentiation and migration, thus  
321 favoring the establishment of the required gene expression program.

## 322 **Methods**

323 **Oligonucleotides.** Oligonucleotides were purchased lyophilized and RP-HPLC purified from Eurogentec  
324 (Seraing, Belgium) and used without further purification. The DNA sequences are listed in Table 3.

325

326 **Table 3.** DNA sequences.

|                    |                                                                            |
|--------------------|----------------------------------------------------------------------------|
| <b>KIT2KIT*</b>    | 5'-CGGGCGGGCGCGAGGGAGGGGAGGGCGAGGAGGGGCGTGGCCGGC-3'                        |
| <b>KIT2</b>        | 5'-CGGGCGGGCGCGAGGGAGGGG-3'                                                |
| <b>KIT*</b>        | 5'-GGCGAGGAGGGGCGTGGCCGGC-3'                                               |
| <b>G-rich noG4</b> | 5'-TGGCCCTGGTGGGCGGAGGCAAAGGGGGAGCCAGGGGCGGAGAAAGGGT-3'                    |
| <b>TEL</b>         | 5'-(TTAGGG) <sub>4</sub> -3'                                               |
| <b>2TEL</b>        | 5'-(TTAGGG) <sub>8</sub> -3'                                               |
| <b>3TEL</b>        | 5'-(TTAGGG) <sub>12</sub> -3'                                              |
| <b>4TEL</b>        | 5'-(TTAGGG) <sub>16</sub> -3'                                              |
| <b>ILPR</b>        | 5'-ACAGGGGTGTGGGGACAGGGGTGTGGGGACAGGGGTGTGGGGACAGGGGTGTGGGG-3'             |
| <b>hTERT</b>       | 5'-GGGGAGGGGCTGGGAGGGCCCGGAGGGGGCTGGGCCGGGACCCGGGAGGGGTCTGGGACGGGGCGGGG-3' |

327

328 Oligonucleotides were resuspended in nuclease-free water from Thermo Fisher Scientific (Waltham, MA,  
329 USA) to obtain 100  $\mu$ M stock solutions, which were then diluted in the proper buffer for further analyses.  
330 The concentrations of the initial stock solutions were measured by UV absorbance at 260 nm on a Uvikon  
331 XS, using molar absorption coefficients calculated with a nearest neighbour model.<sup>56</sup>

332 The solutions were annealed with 85 °C heating for 7 min and then led to equilibrate overnight at room  
333 temperature. Equilibrated solutions were doped with KCl to promote G-quadruplex folding. For duplex DNA  
334 preparation, oligonucleotides were annealed in the presence of equimolar amounts of the complementary  
335 strand.

336

337 **Protein sample preparation.** Recombinant human Vimentin was purchased lyophilized and RP-HPLC  
338 purified from LS-Bio (Seattle, WA, USA) and was stored at -80°C in 8 M urea, 5 mM Tris-HCl (pH 7.5), 1 mM  
339 dithiothreitol, 1 mM EDTA, 0.1 mM EGTA. The day before use, Vimentin was renatured following a protocol  
340 developed by Herrmann and colleagues to avoid extensive polymerization into filaments.<sup>27</sup> Briefly, the  
341 protein was dialyzed at room temperature against dialysis buffer (5 mM Tris-HCl (pH 8.4), 1 mM EDTA, 0.1  
342 mM EGTA, and 1 mM dithiothreitol) containing progressively reduced urea concentration (6, 4, 2, and 1 M  
343 urea). Dialysis against a large volume of dialysis buffer was continued overnight at 4°C. The next day,  
344 dialysis was continued into tetramer buffer (5 mM Tris-HCl (pH 8.4)) for 1 h at room temperature. After  
345 dialysis, the concentration of Vimentin monomers was determined by measuring the absorption at 280 nm  
346 with  $\epsilon = 24,900 \text{ cm}^{-1}\text{M}^{-1}$ .

347

348 **Nuclear extracts.** The human gastric carcinoma cell line HGC-27 (European Collection of Authenticated Cell  
349 Cultures (ECACC) 94042256) was grown in Eagle's Minimal Essential Medium (EMEM, Gibco® Life  
350 Technologies, Carlsbad, USA) supplemented with 10% fetal bovine serum (Gibco® Life Technologies), 2 mM  
351 L-glutamine (Euroclone, Milan, Italy), 1% non-essential amino acids (Euroclone) and 1%  
352 penicillin/streptomycin (Euroclone), under a humidified 5% CO<sub>2</sub> atmosphere, at 37°C. Nuclear extracts were  
353 obtained as described by Abmayr and Workman with minor changes.<sup>57</sup> Briefly, confluent HGC-27 cells,

354 previously seeded in 4 Petri dishes (10-cm diameter) were scraped off and incubated with a hypotonic  
355 buffer (20 mM HEPES (pH 7.9), 1.5 mM MgCl<sub>2</sub>, 20 mM KCl, 0.5 % Triton X-100, 0.5 mM PMSF, 1 mM  
356 dithiothreitol, 1X protease inhibitor cocktail (Merck, Darmstadt, Germany)) for 15 min on ice. Nuclei were  
357 pelleted by centrifugation and then incubated with a high-salt buffer (20 mM HEPES (pH 7.9), 25% glycerol,  
358 1.5 mM MgCl<sub>2</sub>, 420 mM KCl, 0.5 % Triton X-100, 0.5 mM PMSF, 1 mM dithiothreitol, 1X protease inhibitor  
359 cocktail) for 30 min on ice. Released nuclear proteins were quantified according to the Bradford method.

360

361 **Pull-down Assays.** 600 μL of Streptavidin-coated paramagnetic particles (Promega, Milan, Italy) were  
362 washed three times with 600 μL of PBS-1X (Euroclone, Milan, Italy) and then resuspended in 60 μL of PBS-  
363 1X. 2 μM 5'-biotinylated KIT2KIT\* was previously annealed in 10 mM potassium phosphate (pH 7.4) and  
364 subsequently equilibrated overnight in the presence of 150 mM KCl, to promote G-quadruplex folding. For  
365 duplex DNA preparation, 2 μM 5'-biotinylated KIT2KIT\* was annealed in 10 mM potassium phosphate (pH  
366 7.4) in the presence of equimolar amounts of the complementary strand.

367 The oligonucleotide was then added to the beads and incubation was performed for 30 min at room  
368 temperature. Beads were washed three times with 600 μL of oligonucleotide buffer and then resuspended  
369 in 60 μL of pull-down buffer (20 mM HEPES (pH 7.9), 100 mM KCl, 0.2 mM EDTA, 0.5 mM dithiothreitol, 0.2  
370 mM PMSF, 3 μM poly[dA-dT], 20% glycerol). 100 μg of nuclear extract were added to the beads and  
371 incubation was performed for 1 h at room temperature. Protein elution was performed with 60 μL of pull-  
372 down buffer containing increasing concentration of KCl (250 mM, 500 mM, 750 mM, 1M). The last elution  
373 was performed by boiling beads for 5 min in Laemmli SDS-PAGE sample loading buffer.<sup>26</sup> All fractions were  
374 run on Laemmli SDS-PAGE. After staining with colloidal Coomassie Brilliant Blue G250, interesting bands  
375 were cut and subjected to in-gel trypsin digestion and LC-MS<sup>E</sup> analyses for protein identification.

376

377 **Electrophoretic Mobility Shift Assays.** Electrophoretic mobility shift assays (EMSA) were performed on 1.5  
378 % agarose gels in 0.5X TBE buffer (0.89 M Tris-Borate, 20 mM EDTA, pH 8.0) supplemented with 10 mM KCl.  
379 Samples contained 500 nM DNA and 8 μM Vimentin, in 5 mM Tris-HCl (pH 8.4), 150 mM KCl. For the Job  
380 method, samples contained constant sum of Vimentin and oligonucleotide concentrations (10 μM), at  
381 variable molar fractions. Vimentin was added on oligonucleotides previously annealed in the reaction  
382 buffer and incubation was performed for 1 h at room temperature. Gel loading buffer (50% glycerol, 50%  
383 water) was added to the samples immediately before loading. Electrophoresis proceeded for 1 h at 6V/cm  
384 at 4 °C. Gels were stained with Sybr Green II for nucleic acid visualization and, afterwards, with Coomassie  
385 Brilliant Blue G250 for protein detection. Gel images were acquired with a Geliance 600 apparatus. Bands  
386 belonging to the DNA-Vimentin complex were quantified with ImageJ software. Quantification performed  
387 on Sybr Green II or Coomassie stained gels provided identical results.

388

389 **Circular Dichroism Spectroscopy.** Circular dichroism (CD) spectra were acquired on a JASCO J-810  
390 spectropolarimeter equipped with a Peltier temperature controller. CD spectra were recorded from 235 to  
391 330 nm with the following parameters: scanning speed of 100 nm/min, band width of 2 nm, data interval of  
392 0.5 nm and response of 2 s. Measurements were performed using a 1 cm path length quartz cuvette at  
393 oligonucleotide concentration of 2 μM in 5 mM Tris-HCl (pH 8.4), 150 mM KCl. Observed ellipticities were  
394 converted to Molar Ellipticity which is equal to deg·cm<sup>2</sup>·dmol<sup>-1</sup>, calculated using the DNA residue  
395 concentration in solution.

396

397 **Fluorescence anisotropy.** Fluorescence anisotropy measurements were performed on a JASCO FP-6500  
398 spectrofluorometer equipped with polarization devices and with a Peltier temperature controller.  
399 Measurements were performed at 25°C using a 1 cm path length quartz cuvette with the following

400 parameters: 495 nm excitation wavelength, 520 nm emission wavelength, band width of 5 nm, response 8s,  
401 sensitivity high, 2 acquisitions. The instrument G factor was determined prior to anisotropy measurements.  
402 5'-6-FAM labelled oligonucleotides were used at a concentration of 5 nM in 5 mM Tris-HCl (pH 8.4), 150  
403 mM KCl. Titrations were performed by adding increasing concentrations of recombinant Vimentin to the  
404 oligonucleotide solution. After mixing, the solution was led to equilibrate for 10 min at room temperature  
405 before acquisition. Experiments were performed in triplicate. Acquired data were fitted according to a 1:1  
406 binding model with the following equation:  
407

$$A_{obs} = A_0 + \Delta A \times \frac{[DNA] + [VIM] + K_D - \sqrt{([DNA] + [VIM] + K_D)^2 - 4 \times [DNA] \times [VIM]}}{2 \times [DNA]}$$

408  
409 where [DNA] and [VIM] stand for DNA and tetrameric Vimentin concentrations, respectively;  $A_{obs}$  is the  
410 observed anisotropy value;  $A_0$  is the anisotropy value in the absence of protein;  $\Delta A$  represents the total  
411 change in anisotropy between free and fully bound DNA, and  $K_D$  is the equilibrium dissociation constant.  
412

413 **Trypsin limited proteolysis.** The solution of Vimentin in 5 mM Tris-HCl (pH 8.4) was loaded on a Pierce™  
414 Detergent Removal Spin Column (Thermo Scientific) and eluted in the same buffer. Limited proteolysis was  
415 conducted on this protein solution (0.43 mg/mL) without or with addition of stoichiometric amounts of  
416 DNA, in 150 mM KCl. The reaction was initiated upon addition of trypsin at an enzyme/substrate ratio of  
417 1/500 by weight and incubated at 37 °C without stirring for 1, 5 and 30 min. Aliquots taken at each time of  
418 incubation were quenched by adding 0.3% TFA solution, lyophilized and then analyzed by SDS-PAGE.  
419 Labelled bands were cut and subjected to 'in-gel' trypsin digestion and LC- MS<sup>E</sup> analyses for peptide  
420 sequencing. The sequence of full-length Vimentin used in the experiments was also confirmed by MS  
421 analysis of the recombinant protein (calculated average mass 53520.6 Da and measured mass 53520.6 Da,  
422 Supplementary Fig. S5).  
423

424 **In-gel digestion.** In-gel digestion of protein bands was performed according to Shevchenko et al.<sup>58</sup> Briefly,  
425 excised bands were cut into small cubes, washed with water, with 50% acetonitrile in water and shrunk  
426 with neat acetonitrile. Gel particles were swelled in 10 mM dithiothreitol, 0.1 M NH<sub>4</sub>HCO<sub>3</sub> and incubated  
427 for 45 min at 56°C. After cooling at room temperature, the supernatant was replaced with the same volume  
428 of iodoacetamide solution (55 mM iodoacetamide in 0.1 M NH<sub>4</sub>HCO<sub>3</sub>) and the tubes were incubated for 30  
429 min in the dark at room temperature. After removal of the iodoacetamide solution, gel pieces were washed  
430 again with water followed by 50% acetonitrile in water and shrunk with neat acetonitrile to remove  
431 completely the Coomassie staining. The gel particles were eventually rehydrated on ice in a solution  
432 containing 5 ng/μL of trypsin (Promega, modified sequencing grade) in 50 mM NH<sub>4</sub>HCO<sub>3</sub>. After complete  
433 rehydration, gel pieces were covered with 50 mM NH<sub>4</sub>HCO<sub>3</sub> and incubated overnight at 37°C. The  
434 supernatants were then transferred to clean tubes and peptides were extracted from gel particles upon  
435 incubation with 5 % formic acid in water followed by dilution with an equal volume of neat acetonitrile. All  
436 the peptide-containing supernatants were combined and dried using a Speed-Vac system (Savant).  
437

438 **Mass spectrometry analyses.** The tryptic digests of the gel bands were analysed using a Xevo G2-S QToF  
439 (Waters) equipped with a Waters Acquity H-Class UPLC system. Mobile phase A consisted in 0.1% formic  
440 acid in water while mobile phase B was 0.1% formic acid in acetonitrile. For protein identification, LC  
441 analyses were performed using an ACQUITY BEH C18 VanGuard Pre-Column (2.1x5mm, 1.7μm, Waters) in  
442 line with an ACQUITY UPLC BEH C18 column (1.0x100mm, 1.7μm, Waters). Peptide separation was  
443 performed using a linear gradient from 3% to 65% of B in 36 minutes at a flow rate of 0.1 mL/min, with a

444 column temperature set at 30 °C. For the digests of the bands from the proteolysis experiments,  
445 separations were carried out on an AdvanceBio Peptide Map Guard (2.1×5 mm, 2.7µm, Agilent  
446 technologies) and AdvanceBio Peptide Map column (2.1×150 mm, 2.7µm). Peptide separation was  
447 performed using a linear gradient from 2% to 65% of B in 36 minutes at a flow rate of 0.2 mL/min, with a  
448 column temperature set at 30 °C. For all the LC-MS<sup>E</sup> analyses, the Xevo G2-S QToF operated in the ESI  
449 positive ion resolution mode and with a detection window between 50-2000 m/z. MS<sup>E</sup> acquisition was  
450 performed by alternating two MS data functions: one for acquisition of peptide mass spectra with the  
451 collision cell at low energy (6 V), and the second for the collection of peptide fragmentation spectra with  
452 the collision cell at elevated energy (linear ramp 20 to 40 V). Analyses were performed with LockSpray™  
453 using a solution of 1 ng/µL LeuEnk in 50% acetonitrile, 0.1% formic acid in water. For protein identification,  
454 LC-MS<sup>E</sup> data were analysed using the on-line MASCOT server ([www.matrixscience.com](http://www.matrixscience.com)) against the Swiss-  
455 Prot database (release 2020\_06). For Vimentin identification, a taxonomy filter to Homo sapiens was  
456 applied and a contaminants database was included (See Supplementary Material-Excel file).

457 The following parameters were used in the MASCOT search: trypsin specificity; maximum number of  
458 missed cleavages, 1; fixed modification, carbamidomethyl (Cys); variable modifications, oxidation (Met);  
459 peptide mass tolerance, ± 10 ppm; fragment mass tolerance, ± 15 ppm; protein mass, unrestricted; mass  
460 values, monoisotopic. A protein was considered identified when two unique peptides with statistically  
461 significant scores ( $p < 0.05$ ) were obtained.

462 MS<sup>E</sup> data of the gel bands from the proteolysis experiment were processed with the BiopharmaLynx,  
463 setting trypsin as digest reagent, 1 missed cleavage and carbamidomethyl cysteine as fixed modification.  
464 MS ion intensity threshold was set to 100 counts, and the MS<sup>E</sup> threshold was set to 100 counts. MS mass  
465 match tolerance and MS<sup>E</sup> mass match tolerance were set to 10 ppm. The peptide list obtained from the LC-  
466 MS analysis of Vimentin at 0 min of proteolysis was reduced to represent only peptides with an intensity  
467 higher than 3000 counts and it was considered as the reference list of tryptic peptides. For the digests of  
468 the bands at the different times of incubation, peptides with a signal higher than 100 counts were  
469 considered identified, provided that they displayed a retention time in accordance with the same peptide in  
470 the reference list. In order to identify the region of Vimentin in the different gel bands, the percent ratio  
471 between the intensity of each peptide in the LC-MS analysis of the digest of the band and in the reference  
472 list was calculated. This calculation was performed in order to consider the different ionization efficiency of  
473 the different peptides.

474

475 **QPARSE search and GO enrichment analysis.** The whole set of human genes were downloaded from  
476 ENSEMBL<sup>37</sup> (GENCODE v34) and the upstream 100 nucleotides from the transcription starting site (TSS) of  
477 each gene were extracted to search for double and triple putative G4 repeats (double\_triple\_G4\_PQS). The  
478 pattern search was performed using QPARSE<sup>34</sup> with the following options: i) for double G4 repeats we  
479 searched for islands of at least 3 (-m 3) and up to 4 (-M 4) Gs/Cs with connecting loops of maximum 5  
480 nucleotides (-L 5), and at least 5 perfect islands (-p 5) out of 8 islands (-n 8) with the bulged islands that  
481 contain only one gap of length 1 (-l 1), ii) for triple G4 repeats we searched for islands of at least 3 (-m 3)  
482 and up to 4 (-M 4) Gs/Cs with connecting loops of maximum 5 nucleotides (-L 5), and at least 8 perfect  
483 islands (-p 8) out of 12 islands (-n 12) with the bulged islands that contain only one gap of length 1 (-l 1).  
484 The searched pattern was extended both in the forward and reverse strand (using the parameter -b C and -  
485 b G to search for PQS in the reverse and forward strand respectively). For comparison purposes, we  
486 calculated the GC content of the 100bp upstream the TSS of all the sequences. To assess whether genes  
487 containing putative G4 repeats were enriched in functional categories or signaling pathways, we selected  
488 genes with a high GC content similar to that found in genes containing the searched motifs. We used this



489 list as background population. The list of double\_triple-G4\_PQS vs. the background population were  
490 analyzed in DAVID tool.<sup>38</sup>

491

492

493

## 494 **Acknowledgements**

495 This research was funded by University of Padova, grant number # SISS\_SID19\_01. S.C. PhD fellowship was  
496 founded by University of Padova.

497

## 498 **Author contributions**

499 S.C, S.T. and C.S. conceived the project; S.C. acquired the experimental data; B.S. performed proteolysis  
500 reactions and mass spectrometry analyses; S.C. and C.S analyzed experimental data. M.B. and S.T.  
501 performed bioinformatic analyses; M.G. supervised cell cultures and nuclear extracts production; C.S.  
502 raised the funds. S.C and C.S. wrote the manuscript, which was reviewed and commented by all co-authors.

503

504

## 505 **References**

- 506 1. Lieberman-Aiden, E. *et al.* Comprehensive mapping of long-range interactions reveals folding principles  
507 of the human genome. *Science* **326**, 289–293 (2009).
- 508 2. Dixon, J. R. *et al.* Topological domains in mammalian genomes identified by analysis of chromatin  
509 interactions. *Nature* **485**, 376–380 (2012).
- 510 3. Symmons, O. *et al.* The Shh Topological Domain Facilitates the Action of Remote Enhancers by  
511 Reducing the Effects of Genomic Distances. *Dev. Cell* **39**, 529–543 (2016).
- 512 4. Schoenfelder, S. & Fraser, P. Long-range enhancer-promoter contacts in gene expression control. *Nat.*  
513 *Rev. Genet.* **20**, 437–455 (2019).
- 514 5. Solovei, I., Thanisch, K. & Feodorova, Y. How to rule the nucleus: divide et impera. *Curr. Opin. Cell Biol.*  
515 **40**, 47–59 (2016).
- 516 6. Buchwalter, A., Kaneshiro, J. M. & Hetzer, M. W. Coaching from the sidelines: the nuclear periphery in  
517 genome regulation. *Nat. Rev. Genet.* **20**, 39–50 (2019).
- 518 7. Dixon, J. R. *et al.* Chromatin architecture reorganization during stem cell differentiation. *Nature* **518**,  
519 331–336 (2015).
- 520 8. Mirny, L. A., Imakaev, M. & Abdennur, N. Two major mechanisms of chromosome organization. *Curr.*  
521 *Opin. Cell Biol.* **58**, 142–152 (2019).
- 522 9. Falk, M. *et al.* Heterochromatin drives compartmentalization of inverted and conventional nuclei.  
523 *Nature* **570**, 395–399 (2019).
- 524 10. Shen, J. *et al.* Promoter G-quadruplex folding precedes transcription and is controlled by chromatin.  
525 *Genome Biol.* **22**, 143 (2021).
- 526 11. Achar, Y. J., Adhil, M., Choudhary, R., Gilbert, N. & Foiani, M. Negative supercoil at gene boundaries  
527 modulates gene topology. *Nature* **577**, 701–705 (2020).
- 528 12. Li, L. *et al.* YY1 interacts with guanine quadruplexes to regulate DNA looping and gene expression. *Nat.*  
529 *Chem. Biol.* **17**, 161–168 (2021).
- 530 13. Sen, D. & Gilbert, W. Formation of parallel four-stranded complexes by guanine-rich motifs in DNA and  
531 its implications for meiosis. *Nature* **334**, 364–366 (1988).
- 532 14. Spiegel, J., Adhikari, S. & Balasubramanian, S. The Structure and Function of DNA G-Quadruplexes.  
533 *Trends Chem.* **2**, 123–136 (2020).



- 534 15. Hänsel-Hertsch, R. *et al.* G-quadruplex structures mark human regulatory chromatin. *Nat. Genet.* **48**,  
535 1267–1272 (2016).
- 536 16. Kosiol, N., Juranek, S., Brossart, P., Heine, A. & Paeschke, K. G-quadruplexes: a promising target for  
537 cancer therapy. *Mol. Cancer* **20**, 40 (2021).
- 538 17. Hou, Y. *et al.* Integrative characterization of G-Quadruplexes in the three-dimensional chromatin  
539 structure. *Epigenetics* 1–18 (2019) doi:10.1080/15592294.2019.1621140.
- 540 18. Law, M. J. *et al.* ATR-X Syndrome Protein Targets Tandem Repeats and Influences Allele-Specific  
541 Expression in a Size-Dependent Manner. *Cell* **143**, 367–378 (2010).
- 542 19. Amato, J. *et al.* HMGB1 binds to the KRAS promoter G-quadruplex: a new player in oncogene  
543 transcriptional regulation? *Chem. Commun. Camb. Engl.* **54**, 9442–9445 (2018).
- 544 20. Amato, J. *et al.* Insights into telomeric G-quadruplex DNA recognition by HMGB1 protein. *Nucleic Acids*  
545 *Res.* **47**, 9950–9966 (2019).
- 546 21. Roach, R. J. *et al.* Heterochromatin protein 1 $\alpha$  interacts with parallel RNA and DNA G-quadruplexes.  
547 *Nucleic Acids Res.* **48**, 682–693 (2020).
- 548 22. Monsen, R. C., Chakravarthy, S., Dean, W. L., Chaires, J. B. & Trent, J. O. The solution structures of  
549 higher-order human telomere G-quadruplex multimers. *Nucleic Acids Res.* (2021)  
550 doi:10.1093/nar/gkaa1285.
- 551 23. Monsen, R. C. *et al.* The hTERT core promoter forms three parallel G-quadruplexes. *Nucleic Acids Res.*  
552 **48**, 5720–5734 (2020).
- 553 24. Schonhoft, J. D. *et al.* Direct experimental evidence for quadruplex-quadruplex interaction within the  
554 human ILPR. *Nucleic Acids Res.* **37**, 3310–3320 (2009).
- 555 25. Rigo, R. & Sissi, C. Characterization of G4-G4 Crosstalk in the c-KIT Promoter Region. *Biochemistry* **56**,  
556 4309–4312 (2017).
- 557 26. Laemmli, U. K. Cleavage of Structural Proteins during the Assembly of the Head of Bacteriophage T4.  
558 *Nature* **227**, 680–685 (1970).
- 559 27. Mücke, N. *et al.* Assembly Kinetics of Vimentin Tetramers to Unit-Length Filaments: A Stopped-Flow  
560 Study. *Biophys. J.* **114**, 2408–2418 (2018).
- 561 28. Tolstonog, G. V., Mothes, E., Shoeman, R. L. & Traub, P. Isolation of SDS-stable complexes of the  
562 intermediate filament protein vimentin with repetitive, mobile, nuclear matrix attachment region, and  
563 mitochondrial DNA sequence elements from cultured mouse and human fibroblasts. *DNA Cell Biol.* **20**,  
564 531–554 (2001).
- 565 29. Petraccone, L. *et al.* Structure and Stability of Higher-Order Human Telomeric Quadruplexes. *J. Am.*  
566 *Chem. Soc.* **133**, 20951–20961 (2011).
- 567 30. Shoeman, R. L. & Traub, P. The in vitro DNA-binding properties of purified nuclear lamin proteins and  
568 vimentin. *J. Biol. Chem.* **265**, 9055–9061 (1990).
- 569 31. Tolstonog, G. V., Li, G., Shoeman, R. L. & Traub, P. Interaction in vitro of type III intermediate filament  
570 proteins with higher order structures of single-stranded DNA, particularly with G-quadruplex DNA.  
571 *DNA Cell Biol.* **24**, 85–110 (2005).
- 572 32. Job, P. Formation and stability of inorganic complexes in solution. *Ann Chim* **9**, (1928).
- 573 33. Snider, N. T. & Omary, M. B. Assays for Posttranslational Modifications of Intermediate Filament  
574 Proteins. *Methods Enzymol.* **568**, 113–138 (2016).
- 575 34. Berselli, M., Lavezzo, E. & Toppo, S. QPARSE: searching for long-looped or multimeric G-quadruplexes  
576 potentially distinctive and druggable. *Bioinforma. Oxf. Engl.* **36**, 393–399 (2020).
- 577 35. Da Ros, S. *et al.* G-Quadruplex Modulation of SP1 Functional Binding Sites at the KIT Proximal  
578 Promoter. *Int. J. Mol. Sci.* **22**, (2020).
- 579 36. Palumbo, S. L., Ebbinghaus, S. W. & Hurley, L. H. Formation of a unique end-to-end stacked pair of G-  
580 quadruplexes in the hTERT core promoter with implications for inhibition of telomerase by G-  
581 quadruplex-interactive ligands. *J. Am. Chem. Soc.* **131**, 10878–10891 (2009).
- 582 37. Howe, K. L. *et al.* Ensembl 2021. *Nucleic Acids Res.* **49**, D884–D891 (2021).

- 583 38. Huang, D. W., Sherman, B. T. & Lempicki, R. A. Systematic and integrative analysis of large gene lists  
584 using DAVID bioinformatics resources. *Nat. Protoc.* **4**, 44–57 (2009).
- 585 39. Mi, H. *et al.* PANTHER version 16: a revised family classification, tree-based classification tool,  
586 enhancer regions and extensive API. *Nucleic Acids Res.* **49**, D394–D403 (2021).
- 587 40. Franke, W. W., Grund, C., Kuhn, C., Jackson, B. W. & Illmensee, K. Formation of cytoskeletal elements  
588 during mouse embryogenesis. III. Primary mesenchymal cells and the first appearance of vimentin  
589 filaments. *Differ. Res. Biol. Divers.* **23**, 43–59 (1982).
- 590 41. Battaglia, R. A., Delic, S., Herrmann, H. & Snider, N. T. Vimentin on the move: new developments in cell  
591 migration. *F1000Research* **7**, 1796 (2018).
- 592 42. Strouhalova, K. *et al.* Vimentin Intermediate Filaments as Potential Target for Cancer Treatment.  
593 *Cancers* **12**, (2020).
- 594 43. Spencer, V. A., Samuel, S. K. & Davie, J. R. Nuclear matrix proteins associated with DNA in situ in  
595 hormone-dependent and hormone-independent human breast cancer cell lines. *Cancer Res.* **60**, 288–  
596 292 (2000).
- 597 44. Zhao, C.-H. & Li, Q.-F. Altered profiles of nuclear matrix proteins during the differentiation of human  
598 gastric mucous adenocarcinoma MGC80-3 cells. *World J. Gastroenterol.* **11**, 4628–4633 (2005).
- 599 45. Murray, M. E., Mendez, M. G. & Janmey, P. A. Substrate stiffness regulates solubility of cellular  
600 vimentin. *Mol. Biol. Cell* **25**, 87–94 (2014).
- 601 46. Soellner, P., Quinlan, R. A. & Franke, W. W. Identification of a distinct soluble subunit of an  
602 intermediate filament protein: tetrameric vimentin from living cells. *Proc. Natl. Acad. Sci. U. S. A.* **82**,  
603 7929–7933 (1985).
- 604 47. Premchandrar, A. *et al.* Structural Dynamics of the Vimentin Coiled-coil Contact Regions Involved in  
605 Filament Assembly as Revealed by Hydrogen-Deuterium Exchange. *J. Biol. Chem.* **291**, 24931–24950  
606 (2016).
- 607 48. Mücke, N. *et al.* Molecular and biophysical characterization of assembly-starter units of human  
608 vimentin. *J. Mol. Biol.* **340**, 97–114 (2004).
- 609 49. Keeling, M. C., Flores, L. R., Dodhy, A. H., Murray, E. R. & Gavara, N. Actomyosin and vimentin  
610 cytoskeletal networks regulate nuclear shape, mechanics and chromatin organization. *Sci. Rep.* **7**, 5219  
611 (2017).
- 612 50. Gesson, K. *et al.* A-type lamins bind both hetero- and euchromatin, the latter being regulated by  
613 lamina-associated polypeptide 2 alpha. *Genome Res.* **26**, 462–473 (2016).
- 614 51. Pascual-Reguant, L. *et al.* Lamin B1 mapping reveals the existence of dynamic and functional  
615 euchromatin lamin B1 domains. *Nat. Commun.* **9**, 3420 (2018).
- 616 52. Georgatos, S. D. & Blobel, G. Lamin B constitutes an intermediate filament attachment site at the  
617 nuclear envelope. *J. Cell Biol.* **105**, 117–125 (1987).
- 618 53. Colucci-Guyon, E., Giménez Y Ribotta, M., Maurice, T., Babinet, C. & Privat, A. Cerebellar defect and  
619 impaired motor coordination in mice lacking vimentin. *Glia* **25**, 33–43 (1999).
- 620 54. Boyne, L. J., Fischer, I. & Shea, T. B. Role of vimentin in early stages of neuritogenesis in cultured  
621 hippocampal neurons. *Int. J. Dev. Neurosci. Off. J. Int. Soc. Dev. Neurosci.* **14**, 739–748 (1996).
- 622 55. Perlson, E. *et al.* Vimentin-Dependent Spatial Translocation of an Activated MAP Kinase in Injured  
623 Nerve. *Neuron* **45**, 715–726 (2005).
- 624 56. Cavaluzzi, M. J. & Borer, P. N. Revised UV extinction coefficients for nucleoside-5'-monophosphates  
625 and unpaired DNA and RNA. *Nucleic Acids Res.* **32**, e13–e13 (2004).
- 626 57. Abmayr, S. M., Yao, T., Parmely, T. & Workman, J. L. Current protocols in molecular biology/edited by  
627 Frederick M. Ausubel *et al.* (2006).
- 628 58. Shevchenko, A., Wilm, M., Vorm, O. & Mann, M. Mass Spectrometric Sequencing of Proteins from  
629 Silver-Stained Polyacrylamide Gels. *Anal. Chem.* **68**, 850–858 (1996).
- 630

**Graphical abstract**

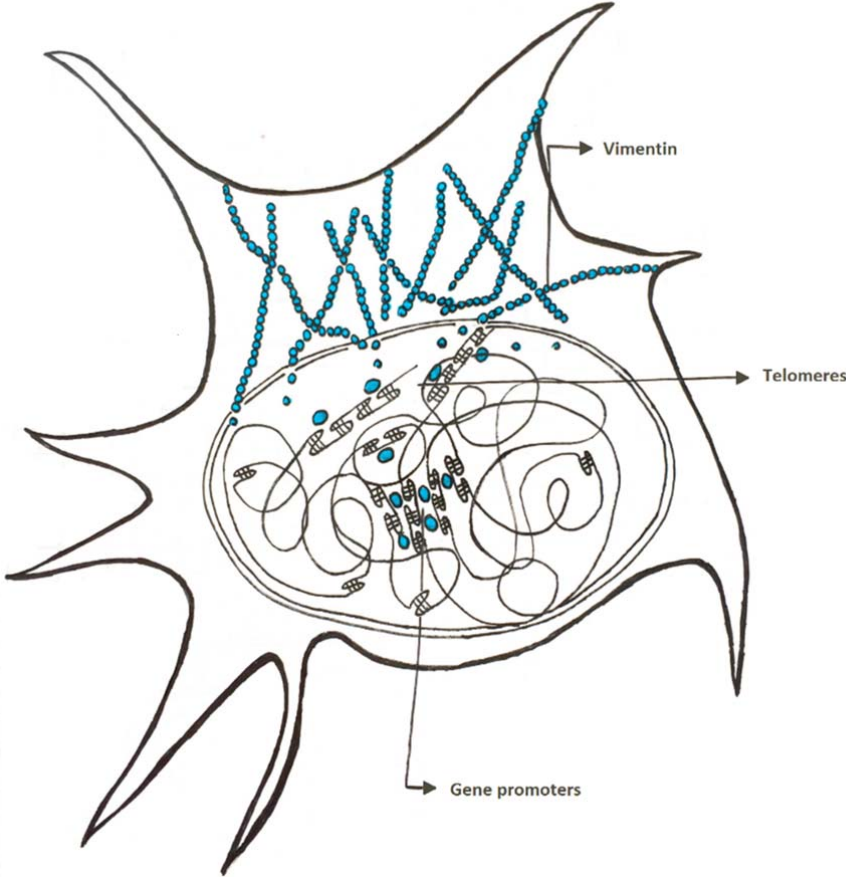

Source: https://www.biorxiv.org/content/biorxiv/early/2021/05/25/2021.05.25.444966.full.pdf
